# Supplementary material
Source: publisher site journal article supplement (https://www.dovepress.com/article/supplementary_file/609813/609813%20Supplementary%20Material.docx)
Supplement: Supplementary file 1 [file 609813%20Supplementary%20Material.docx]

Supplementary

Safety and Feasibility of an Asynchronous AI-integrated Tele-Pulmonary Rehabilitation Application among Patients with COPD

Table 1, Characteristics of patients with <10 completed trainings.

Table 2, Comparison of baseline and clinical characteristics between patients with and without self-reported respiratory worsening.

Table 3, Univariate linear regression analysis of predictors for the rate of sessions completed per training in the study cohort.

Table 1, Characteristics of patients with <10 completed trainings *.

| **Variable** | **Excluded, n=7** |
| --- | --- |
| Age, years | 72 (68-77) |
| Female sex | 2 (29%) |
| Smoking history |  |
| No active smoking | 1 (14%) |
| Former smoking | 5 (71%) |
| Active smoking | 1 (14%) |
| Pack years | 24 (17-33) |
| Cardiovascular comorbidity | 1 (14%) |
| Concurrent interstitial lung disease | 2 (29%) |
| Bronchiectasis | 0 (0%) |
| History of lung cancer | 1 (14%) |
| Chronic oxygen use | 3 (43%) |
| Prior pulmonary rehabilitation | 4 (57%) |
| FEV1, %predicted | 46 (30-60) |

* All continuous variables are presented as median (interquartile range) and categorical variables as n (%).

Table 2, Comparison of baseline and clinical characteristics between patients with and without self-reported respiratory worsening *.

| **Variable** | **No worsening N=95 (77%)** | **≥1 self-reported worsening N=29 (23%)** | **p-value** |
| --- | --- | --- | --- |
| Age | 73 (68-78) | 75 (70-79) | 0.475 |
| Female sex | 51 (54%) | 16 (55%) | 0.888 |
| Smoking history |  |  |  |
| No active smoking | 11 (12%) | 1 (4%) | 0.363 |
| Former smoking | 64 (72%) | 19 (73%) |
| Active smoking | 14 (16%) | 6 (23%) |
| Cardiovascular comorbidity | 15 (16%) | 3 (10%) | 0.466 |
| Concurrent interstitial lung disease | 5 (5%) | 2 (7%) | 0.739 |
| Bronchiectasis | 4 (4%) | 3 (10%) | 0.210 |
| History of lung cancer | 8 (8%) | 2 (7%) | 0.792 |
| Chronic oxygen use | 47 (50%) | 21 (72%) | 0.030 |
| FEV1, %predicted | 50 (32-60) | 44 (32-55) | 0.693 |
| Low saturation events per patient, amount | 1 (0-4) | 2 (0-6) | 0.129 |
| Intense program integration | 15 (16%) | 7 (24%) | 0.303 |

* All continuous variables are presented as median (interquartile range) and categorical variables as n (%).

Table 3, Univariate linear regression analysis of predictors for the rate of sessions completed per training in the study cohort.

| **Variable** | **B** | **Standardized beta** | **p** |
| --- | --- | --- | --- |
| Older age (for each year) | -0.004 | -0.083 | 0.361 |
| Female sex | 0.097 | 0.102 | 0.260 |
| Cardiovascular comorbidity | -0.144 | -0.106 | 0.241 |
| Concurrent interstitial lung disease | -0.084 | -0.041 | 0.653 |
| Bronchiectasis | -0.204 | -0.099 | 0.275 |
| History of lung cancer | 0.158 | 0.111 | 0.219 |
| Chronic oxygen use | -0.059 | -0.062 | 0.494 |
| FEV1, %predicted | 0.008 | 0.274 | 0.010 |
| Low saturation events per patient, amount | 0.002 | 0.101 | 0.263 |
| Intense program integration | -0.073 | -0.058 | 0.519 |
